# Supplementary material for: A revised synthesis of 6-alkoxy-2-aminopurines with late-stage convergence allowing for increased molecular complexity
Source: Royal Society of Chemistry journal article supplement (doi:10.1039/d2nj02204d), 2022-01-01
Supplement: d2nj02204d1.pdf [file d2nj02204d1.pdf]

**A revised synthesis of 6-alkoxy-2-aminopurines with late-stage convergence  
allowing for increased molecular complexity**

Lavleen Mader, John. J Hayward\*, Lisa A. Porter, John F. Trant\*

*Department of Chemistry and Biochemistry, University of Windsor, 401 Sunset Avenue,  
Windsor, ON, N9B 3P4, Canada*

**Supporting Information**

## Comparison of existing and refocused syntheses

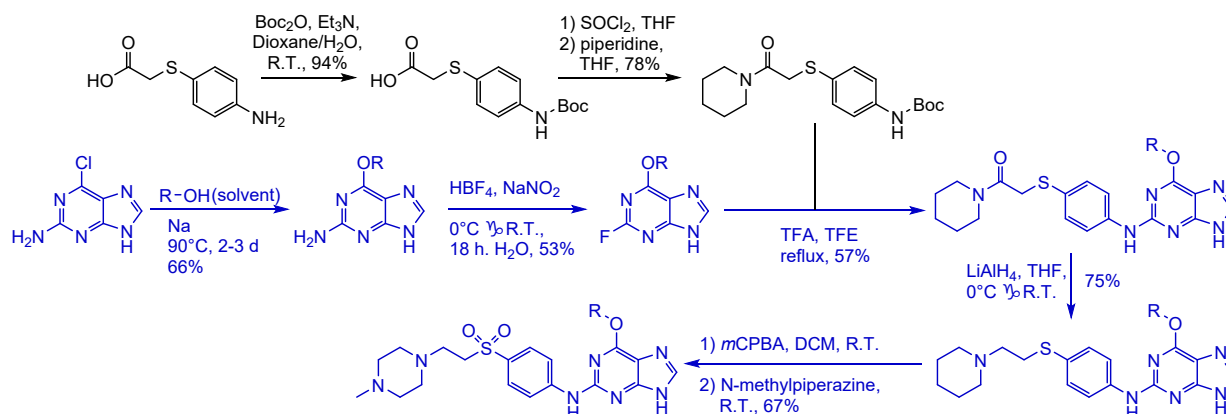

**Scheme S1** Previous synthesis of NU6247.<sup>1</sup> The synthetic steps featuring the O-6 moiety are highlighted in blue. R = Cyclohexylmethyl.

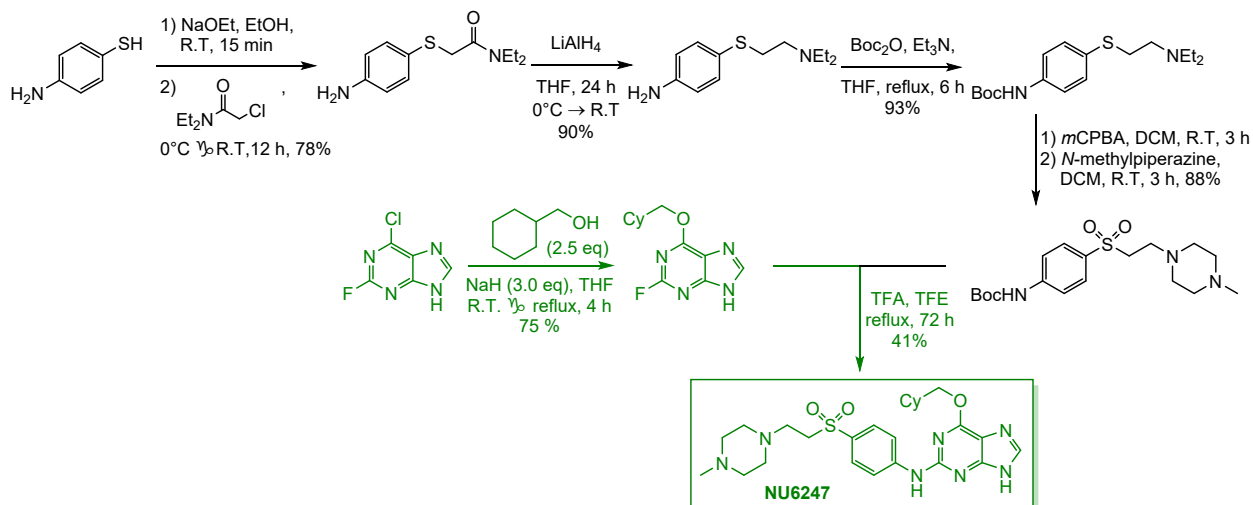

**Scheme S2** Refocused synthesis of NU6247 (this work). The synthetic steps featuring the O-6 moiety are highlighted in green.

**Previous Synthesis:**

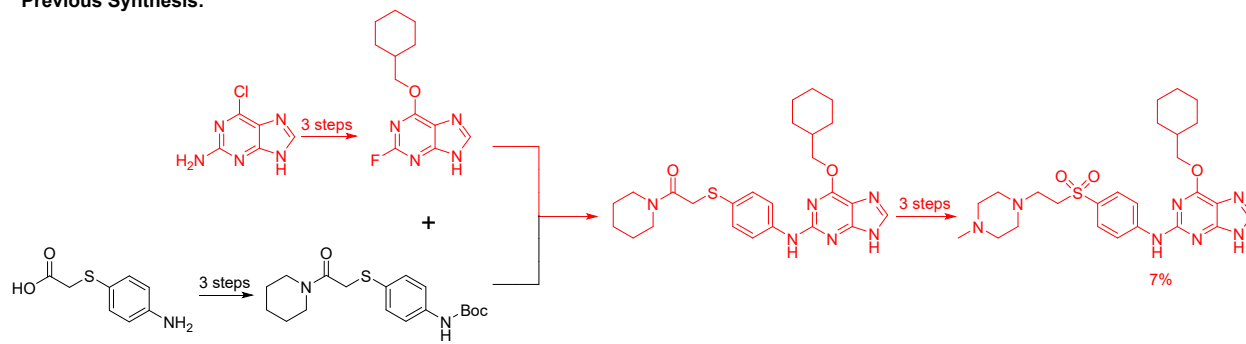

**This work:**

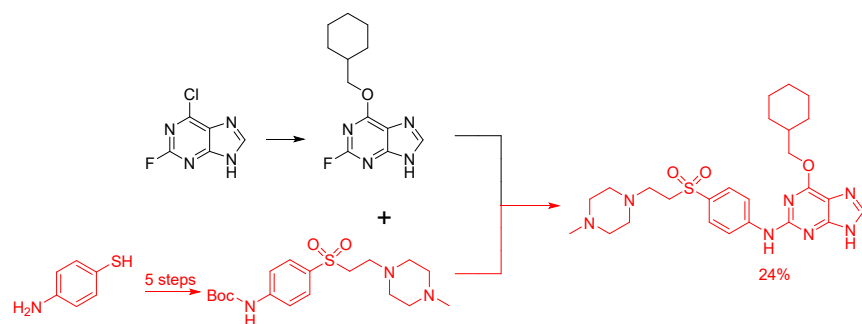

**Scheme S2** Comparison of previous and newly developed synthesis of NU6247 with the yield limiting linear sequences shown in red, which were used to calculate the overall yield.

## Synthesis of 3-aminobenzyl alcohol

### 3-nitrobenzyl alcohol (16)

To a solution of 3-nitrobenzaldehyde (1 g, 6.63 mmol, 1.0 eq) in absolute EtOH (15 mL) was added a suspension of NaBH<sub>4</sub> (0.165 g, 4.87 mmol, 0.66 eq) in absolute EtOH (7 mL) dropwise. The reaction was stirred at room temperature for 1 h and then quenched with 10% NaOH solution (3 mL). Water (5 mL) was added and EtOH was removed under reduced pressure. The product was extracted using EtOAc (5 × 10 mL). The combined organic layers were washed with 5% NaHCO<sub>3</sub> (15 mL) followed by water (10 mL) and then dried over MgSO<sub>4</sub>. EtOAc was removed *in vacuo* to yield a yellow oil (0.93 g, 92%).

**<sup>1</sup>H NMR** (300 MHz, CDCl<sub>3</sub>)  $\delta_{\text{ppm}}$  8.17 (apparent s, 1H), 8.08-8.05 (apparent dd,  $J = 8.1$  Hz, 1.8 Hz, 1H), 7.66-7.63 (apparent dd,  $J = 8.1$  Hz, 1.8 Hz, 1H), 7.51-7.45 (apparent t,  $J = 8.1$  Hz, 1H), 4.76 (s, 2H), 2.88 (br s, 1H). This reaction was performed twice for this project, providing the same yield both times. Characterization data is consistent with previously reported values.<sup>2</sup>

### 3-aminobenzyl alcohol (17)

To a solution of 3-nitrobenzyl alcohol (1.5 g, 9.79 mmol, 1.0 eq) in MeOH (50 mL) under a N<sub>2</sub> atmosphere was added 10% Pd/C (0.15 g, 10 wt %). The reaction mixture was exposed to hydrogen gas using a hydrogen balloon, while displacing nitrogen gas through a bubbler. The bubbler was removed, and the reaction was stirred at room temperature for 24 h, replacing the balloon as needed. The mixture was filtered through celite,

concentrated *in vacuo*, and purified by flash column chromatography (5% MeOH/EtOAc,  $R_f = 0.51$ ) to yield a yellow crystalline solid (0.77 g, 64%).  **$^1\text{H NMR}$**  (300 MHz,  $\text{DMSO-}d_6$ )  $\delta_{\text{ppm}}$  6.96-6.91 (apparent t,  $J = 7.5$  Hz, 1H), 6.55-6.54 (apparent dd,  $J = 2.5$  Hz, 1.6 Hz, 1H), 6.45-6.40 (apparent ddd,  $J = 7.5$  Hz, 2.5 Hz, 1.6 Hz, 2H), 4.99-4.95 (t,  $J = 5.7$  Hz, 1H), 4.96 (br s, 1H), 4.35-4.33 (d,  $J = 5.7$  Hz, 1H). This reaction was performed once for this project. Characterization data is consistent with previously reported values.<sup>3</sup>

# NMR Spectra

Figure S1. <sup>1</sup>H NMR (300 MHz, DMSO-d<sub>6</sub>) of Compound 4a

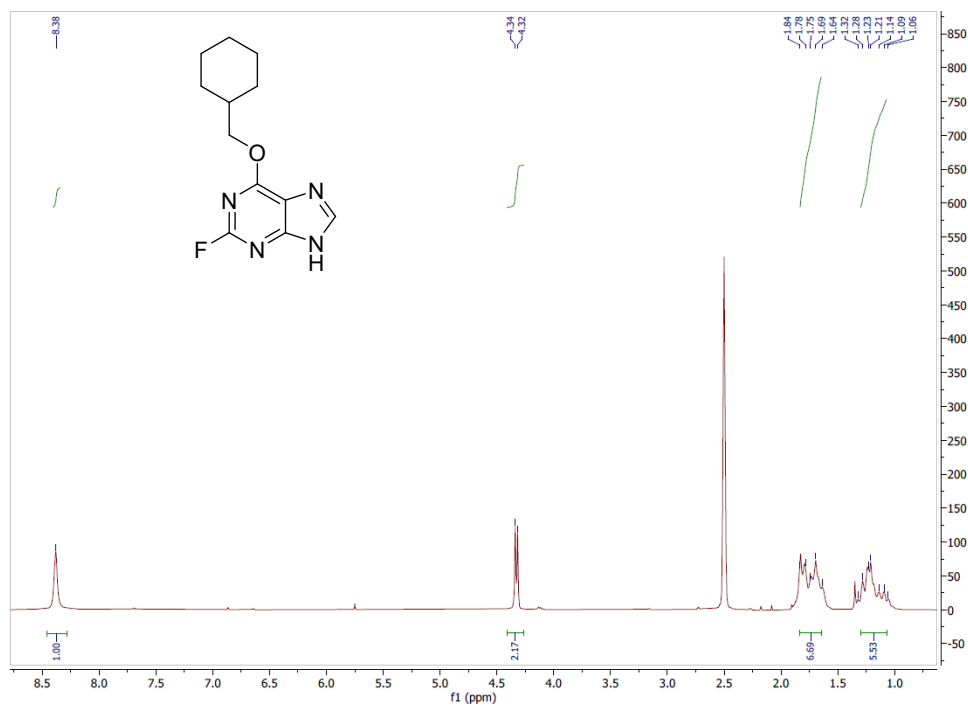

Figure S2. <sup>13</sup>C NMR (125 MHz, DMSO-d<sub>6</sub>) of Compound 4a

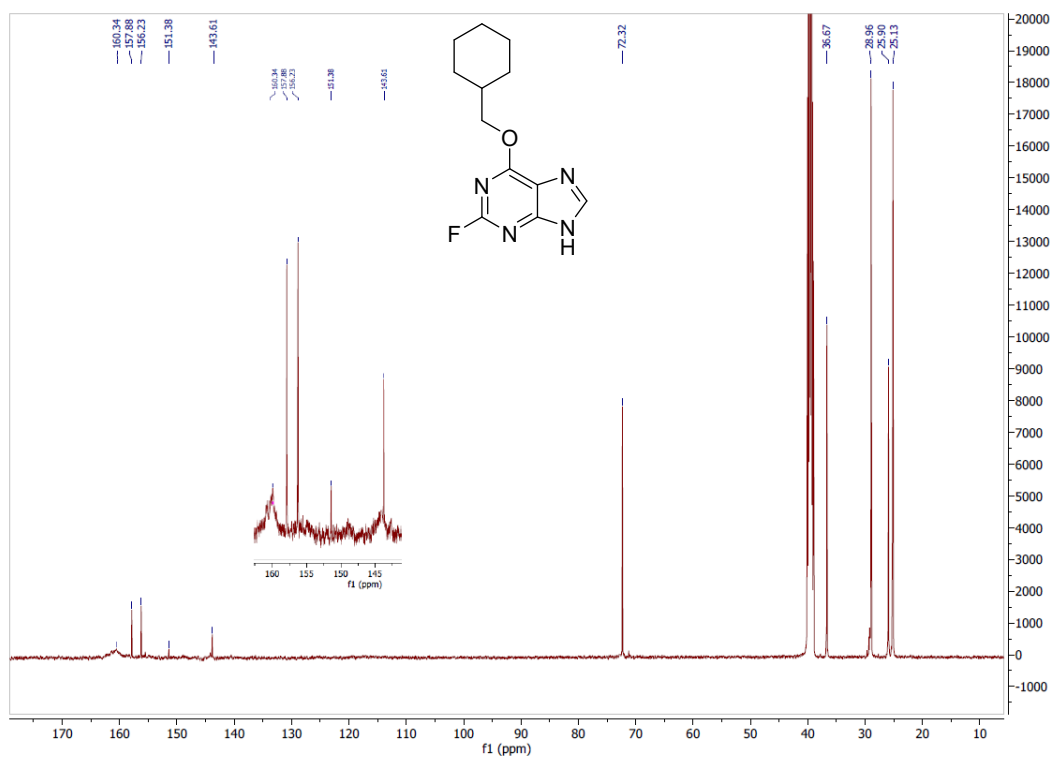

Figure S3.  $^{19}\text{F}$  NMR (470 MHz,  $\text{DMSO-}d_6$ ) of Compound 4a

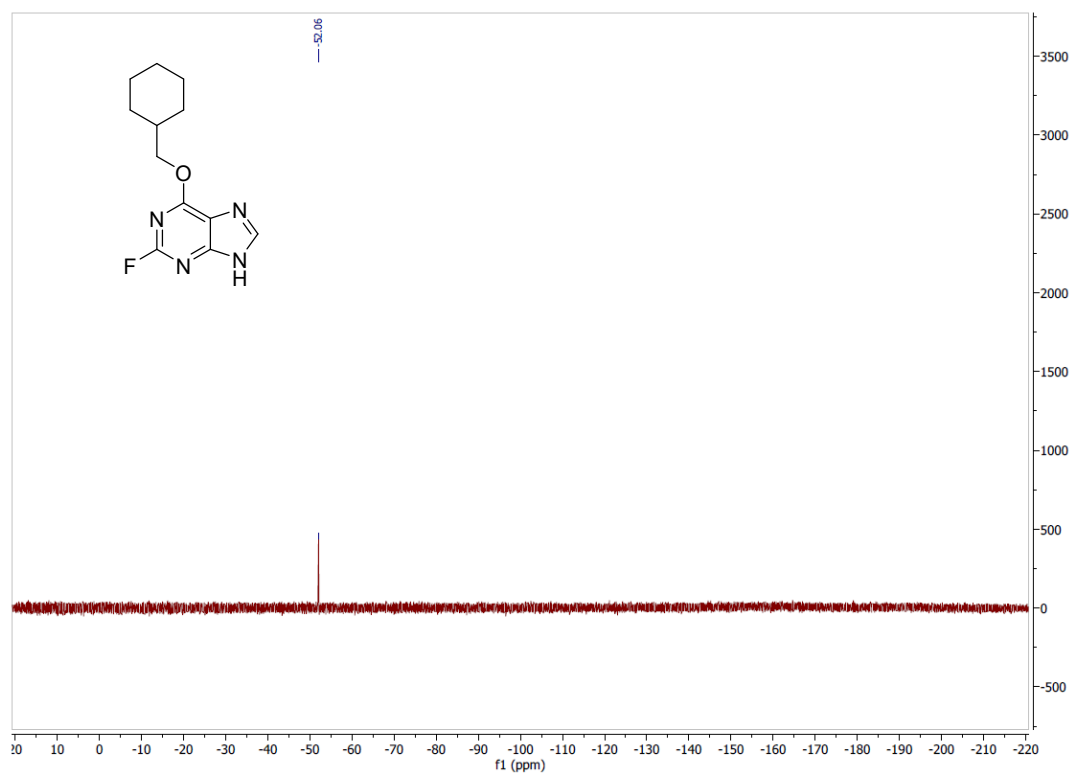

Figure S4.  $^1\text{H}$  NMR (300 MHz,  $\text{DMSO-}d_6$ ) of Compound 4b.

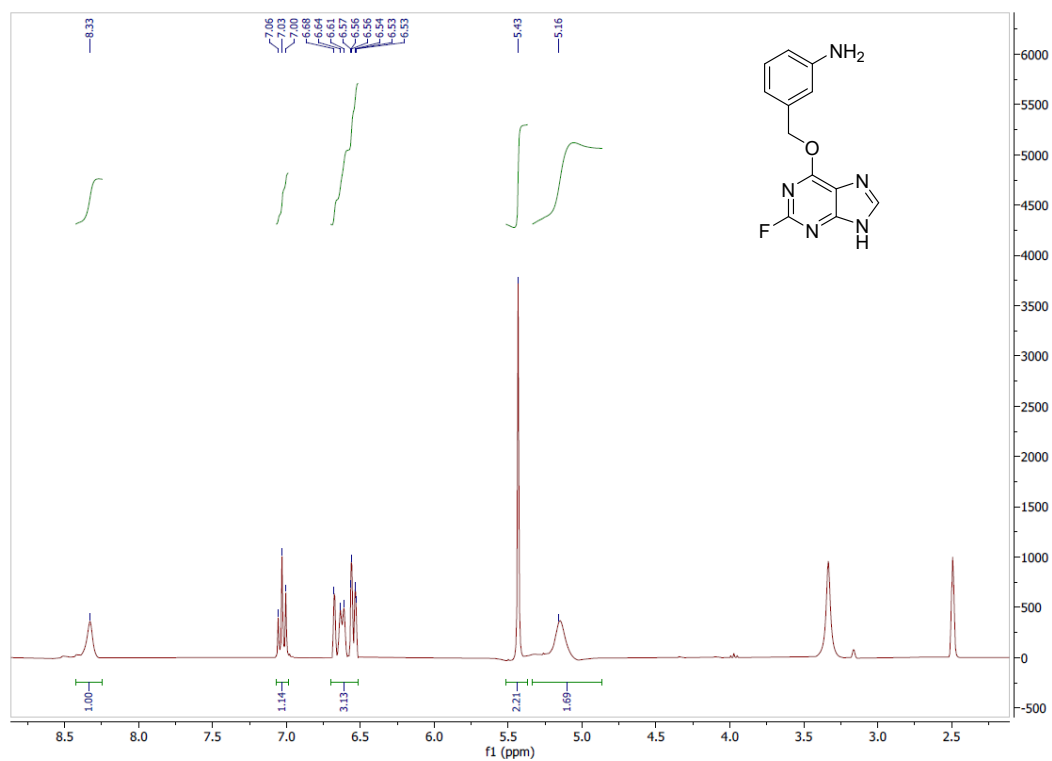

Figure S5.  $^{13}\text{C}$  NMR (125 MHz,  $\text{DMSO-}d_6$ ) of Compound 4b.

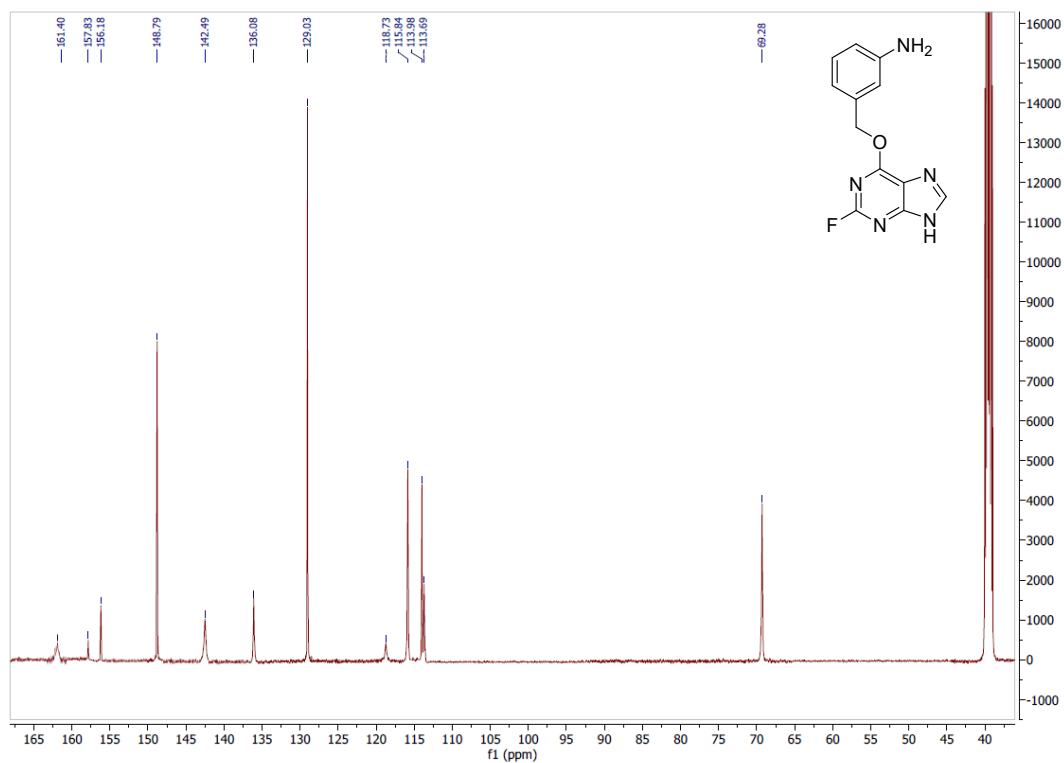



Figure S6.  $^{19}\text{F}$  NMR (470 MHz,  $\text{DMSO-}d_6$ ) of Compound 4b.

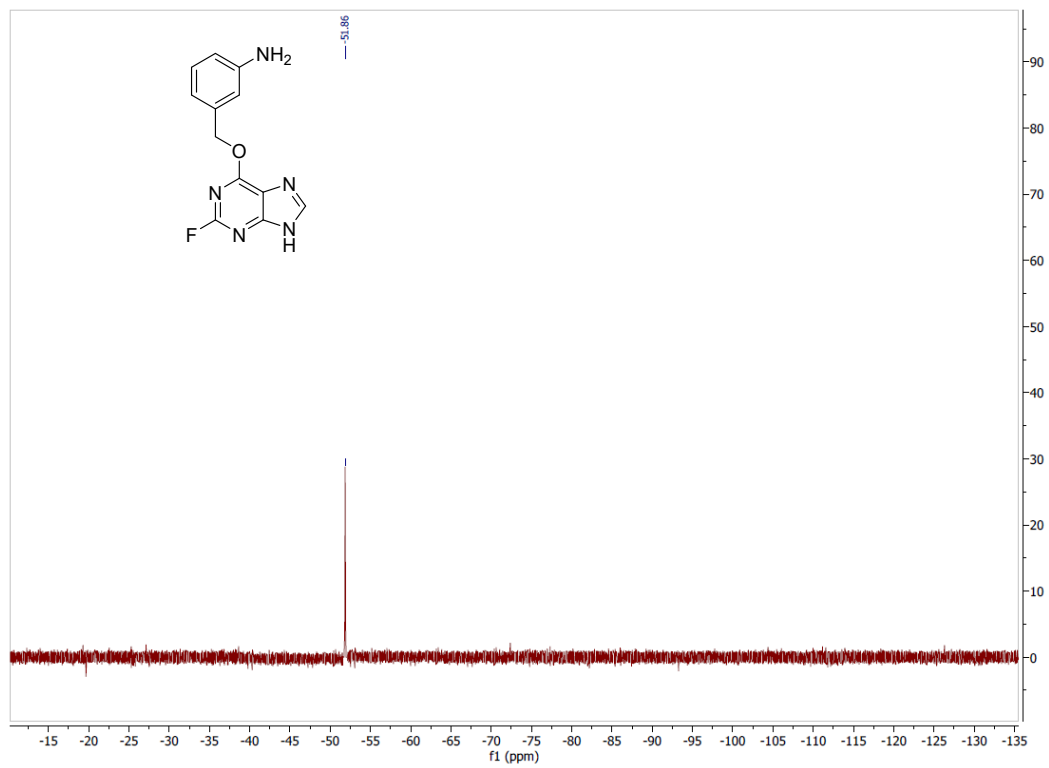

Figure S7. <sup>1</sup>H NMR (300 MHz, CD<sub>3</sub>OD) of Compound 6.

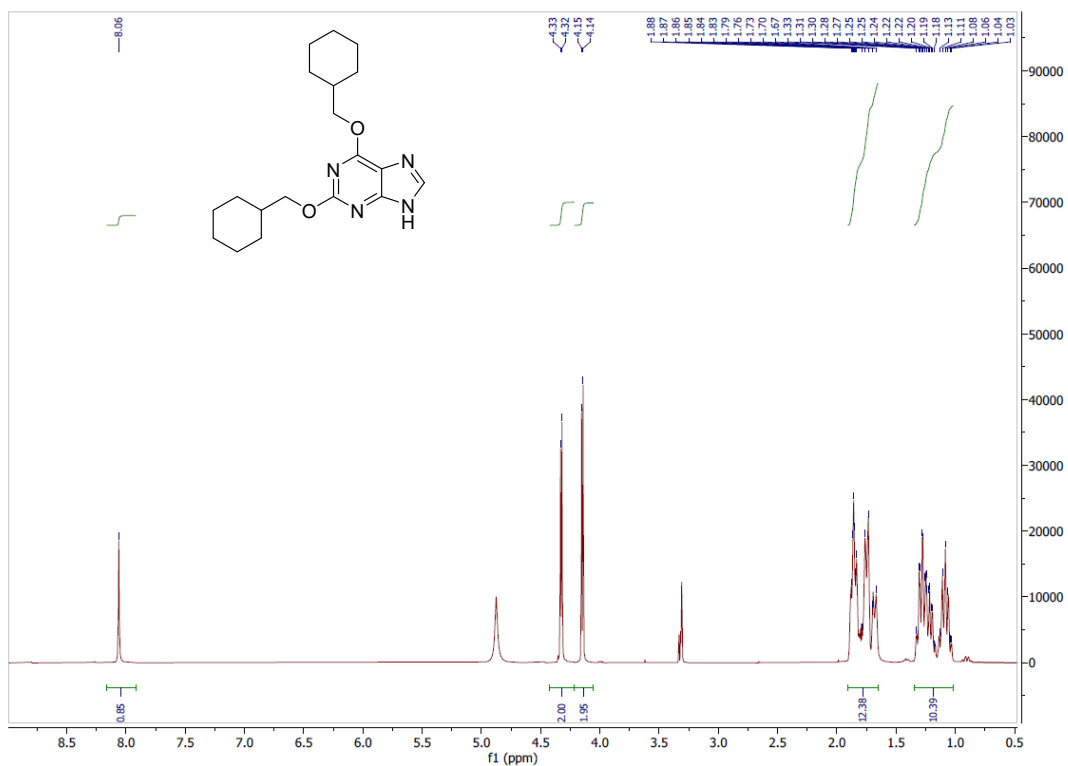

Figure S8. <sup>13</sup>C NMR (75 MHz, CD<sub>3</sub>OD) of Compound 6.

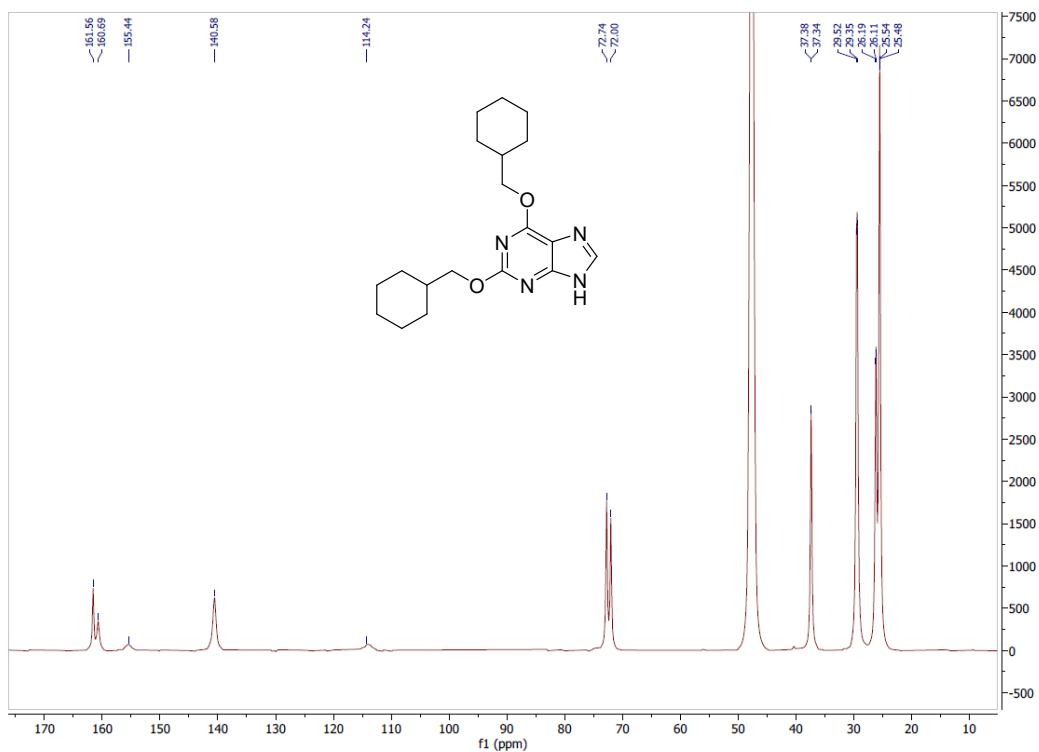

Figure S9. <sup>1</sup>H NMR (300 MHz, CDCl<sub>3</sub>) of Compound 7

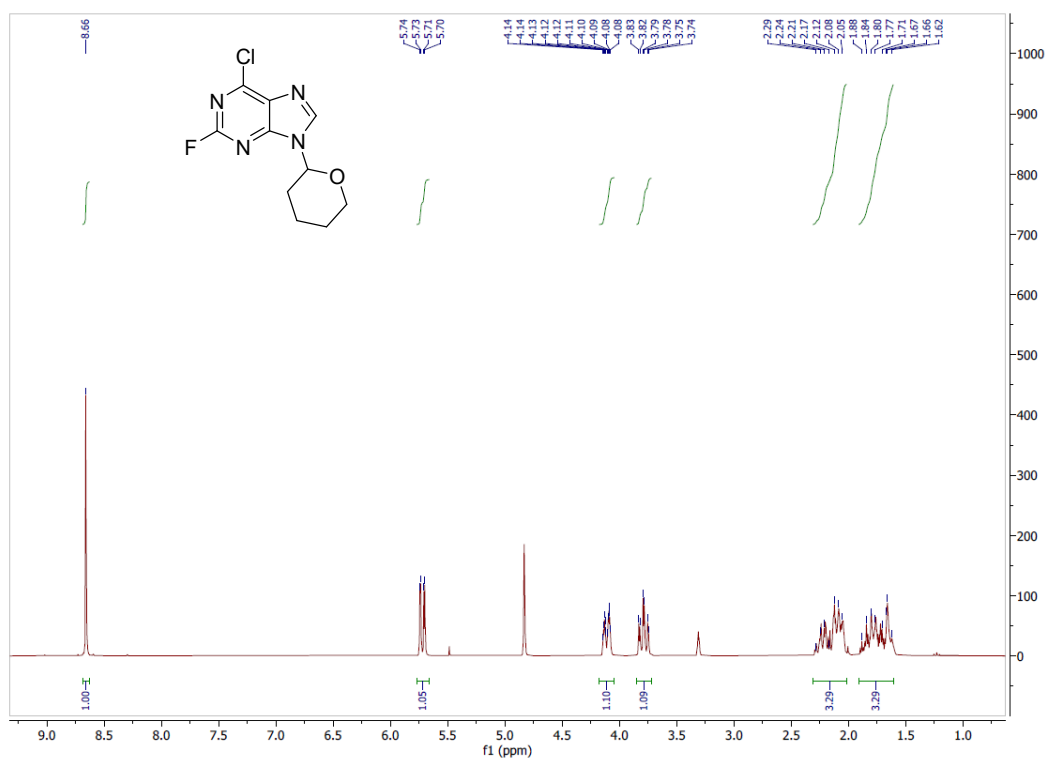

Figure S10. <sup>1</sup>H NMR (300 MHz, D<sub>2</sub>O) of Compound 8.

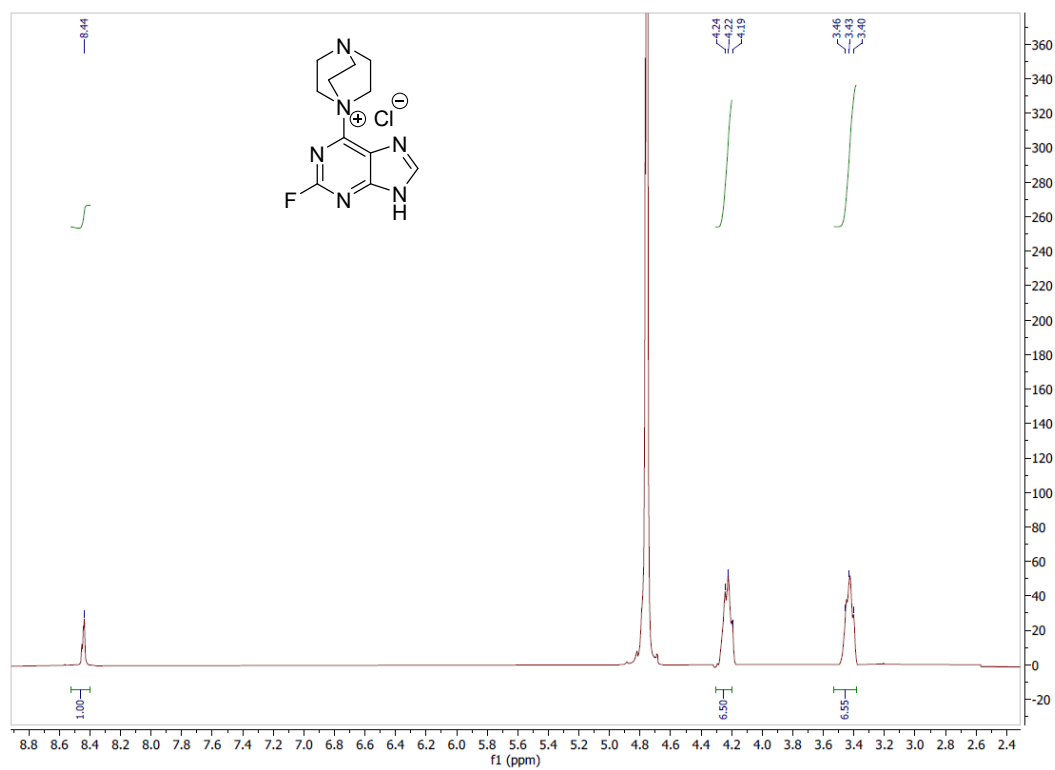

Figure S11.1  
<sup>13</sup>C

NMR (125 MHz, DMSO-*d*<sub>6</sub>) of Compound 8.

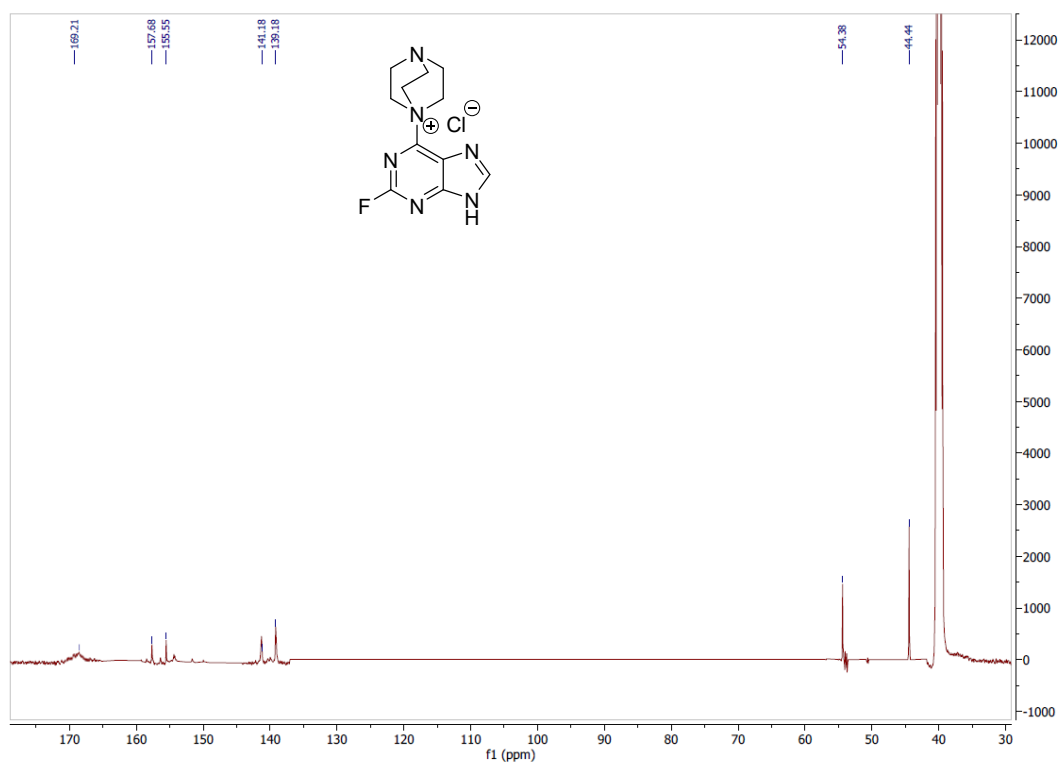

Figure S12.  $^{19}\text{F}$  NMR (470 MHz,  $\text{DMSO-}d_6$ ) of Compound 8.

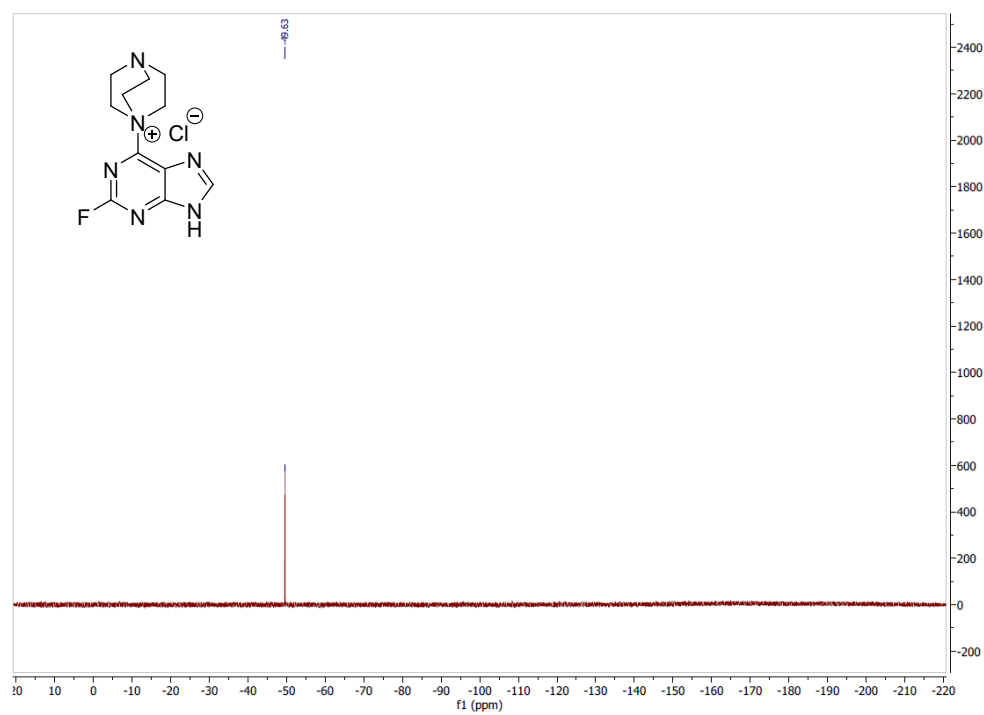

Figure S13.  $^1\text{H}$  NMR (300 MHz,  $\text{DMSO-}d_6$ ) of Compound 9 (NU6102)

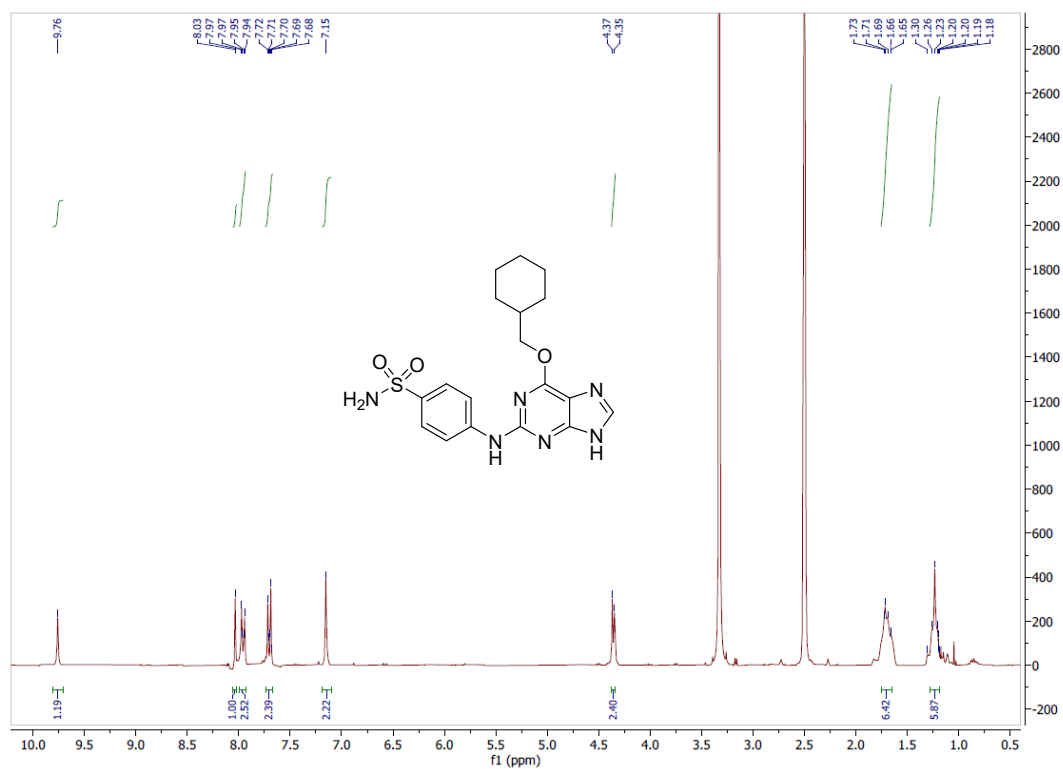



Figure S14. <sup>1</sup>H NMR (300 MHz, DMSO-d<sub>6</sub>) of Compound 11.

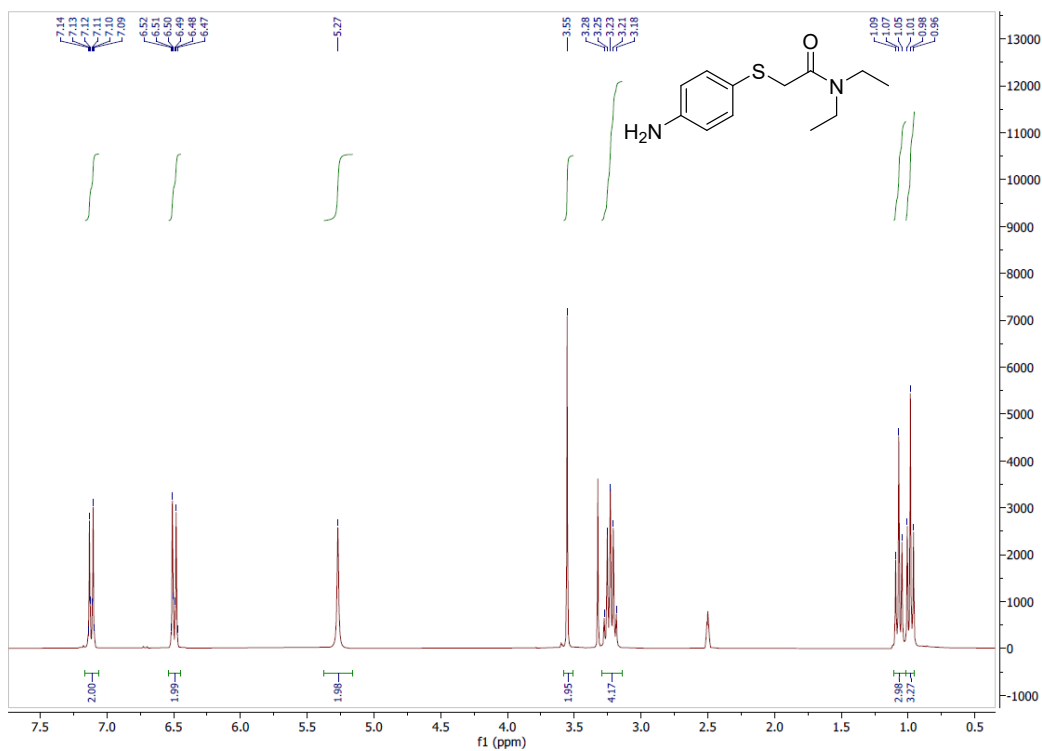

Figure S15. <sup>13</sup>C NMR (75 MHz, DMSO-d<sub>6</sub>) of Compound 11.

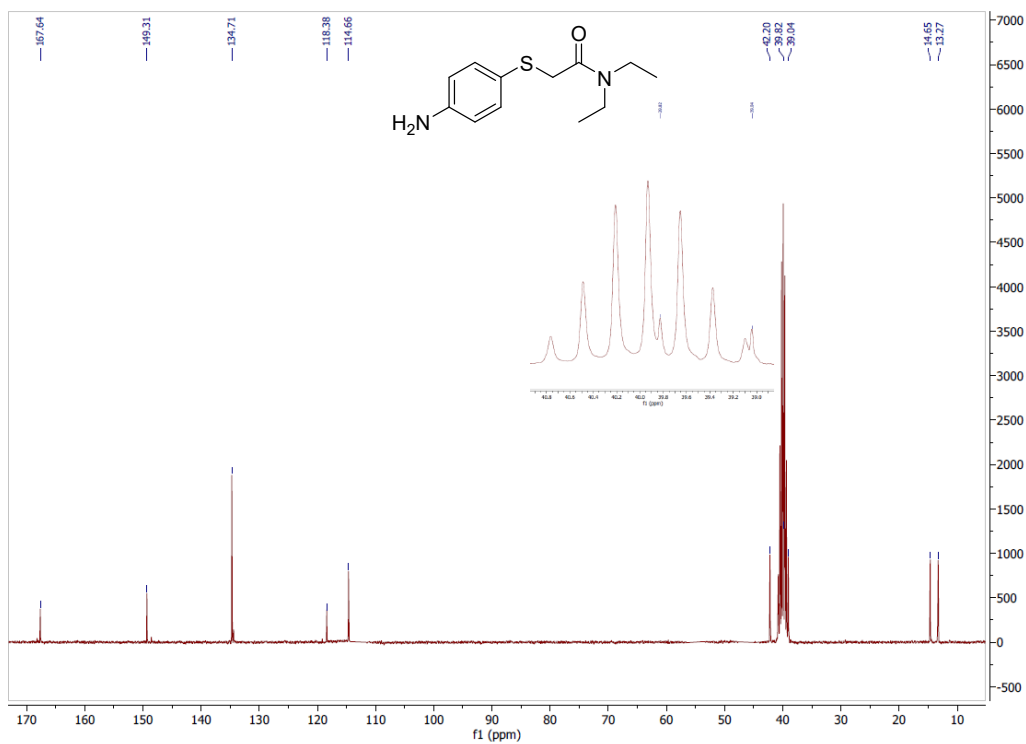

Figure S16. <sup>1</sup>H NMR (300 MHz, CD<sub>3</sub>OD) of Compound 12

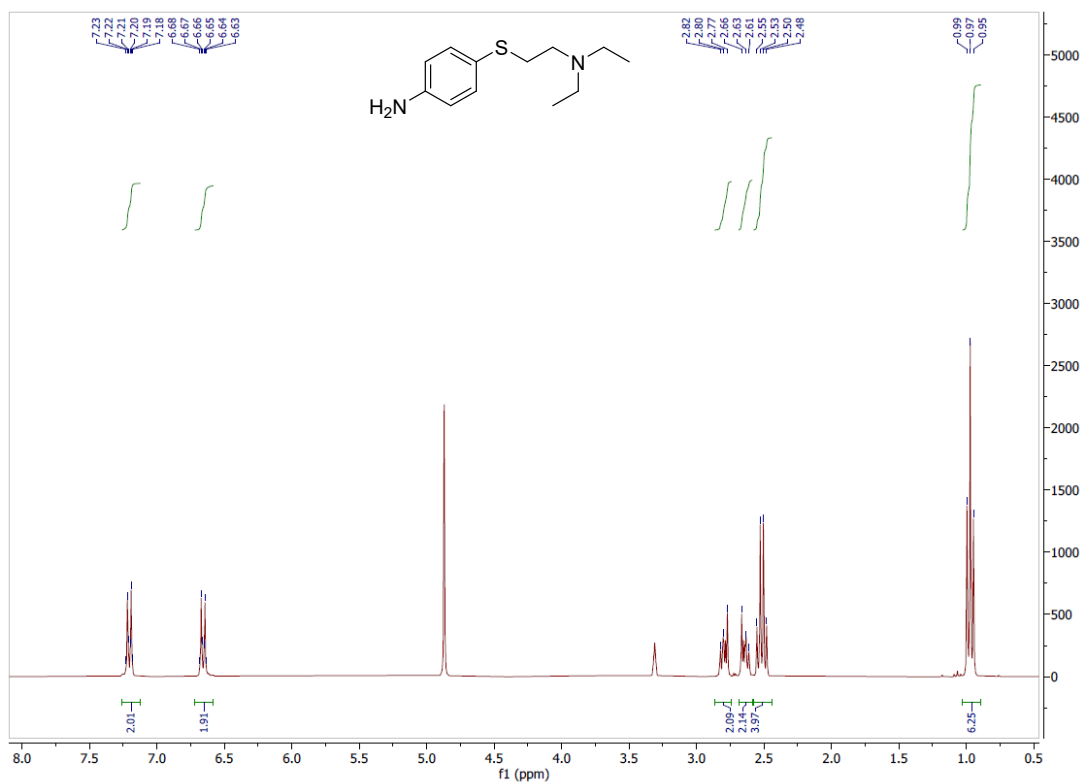

Figure S17. <sup>1</sup>H NMR (300 MHz, CD<sub>3</sub>OD) of Compound 13

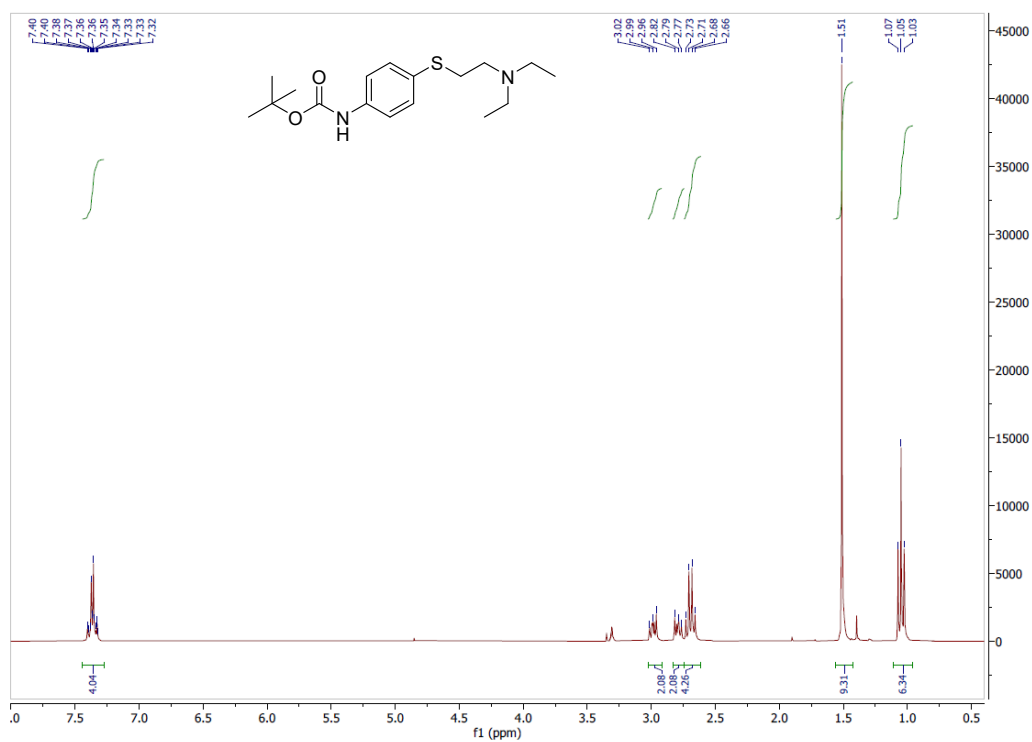



Figure S18. <sup>13</sup>C NMR (75 MHz, CD<sub>3</sub>OD) of Compound 13

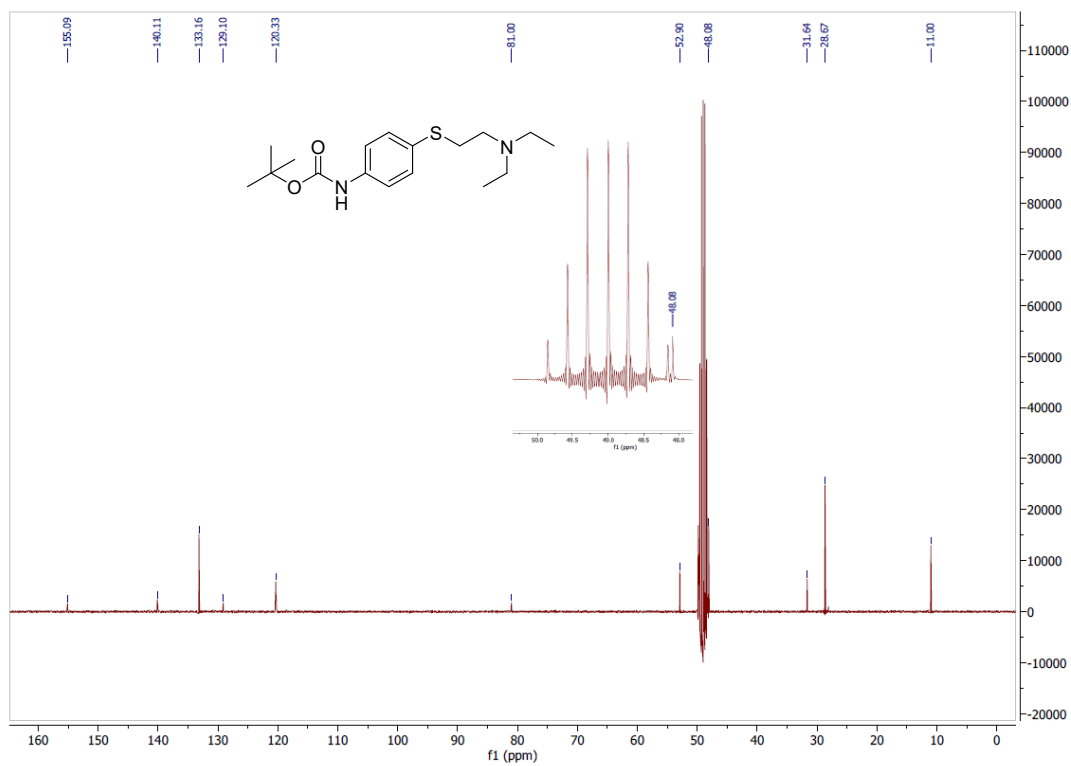

Figure S19. <sup>1</sup>H NMR (300 MHz, CDCl<sub>3</sub>) of Compound 14

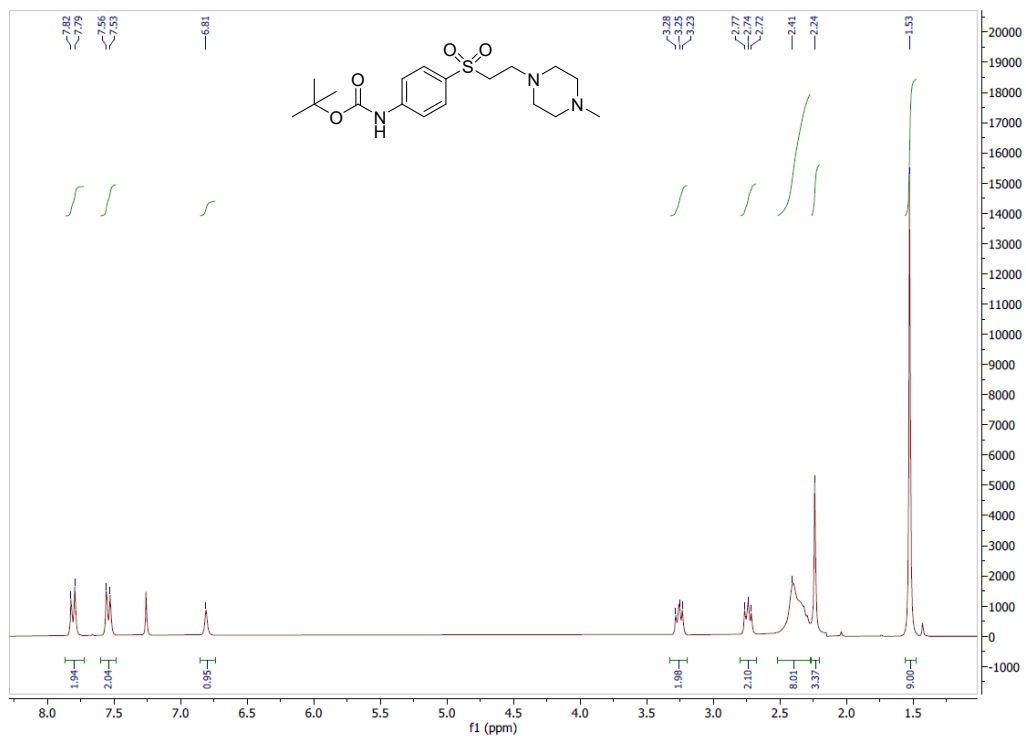

Figure S20.  $^{13}\text{C}$  NMR (75 MHz,  $\text{CDCl}_3$ ) of Compound 14

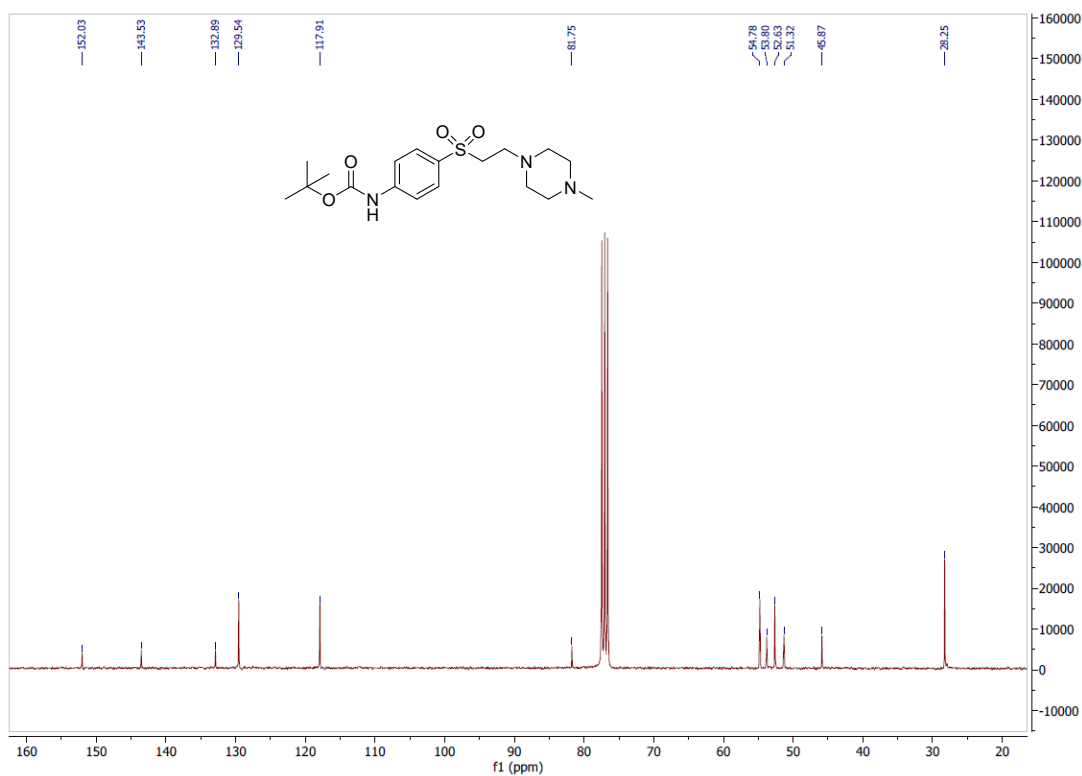

Figure S21.  $^1\text{H}$  NMR (300 MHz,  $\text{CDCl}_3$ ) of Compound 15 (NU6247)

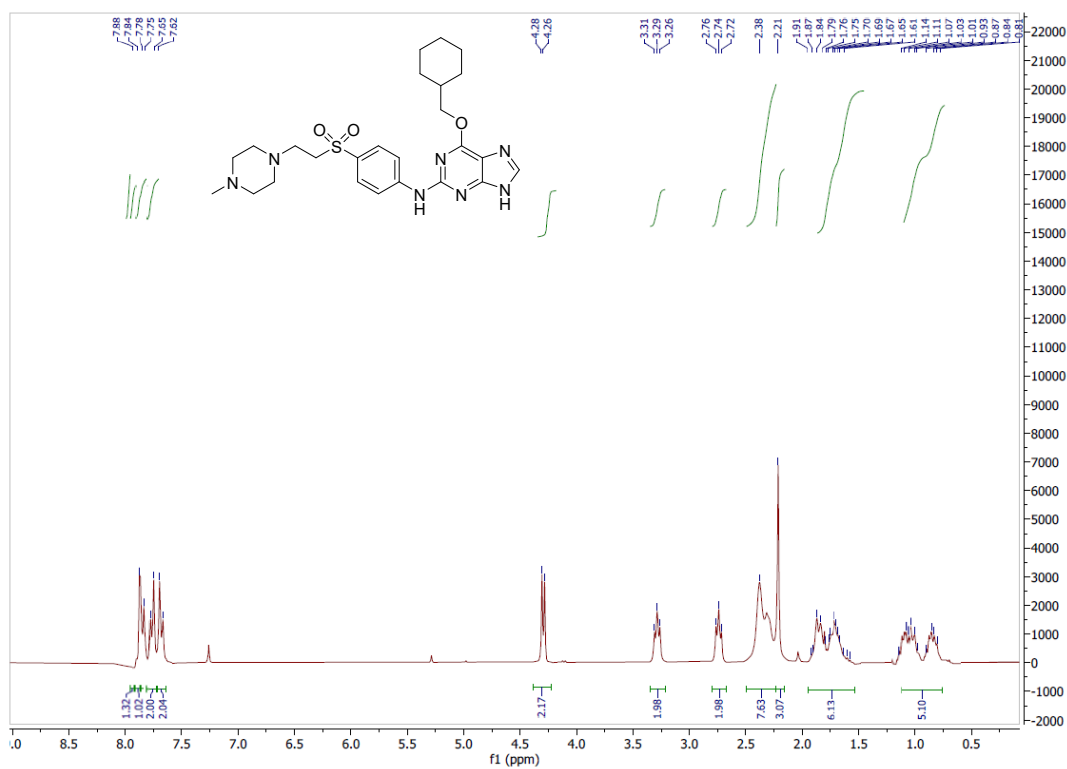

Figure S22.  $^{13}\text{C}$  NMR (125 MHz,  $\text{CDCl}_3$ ) of Compound 15 (NU6247)

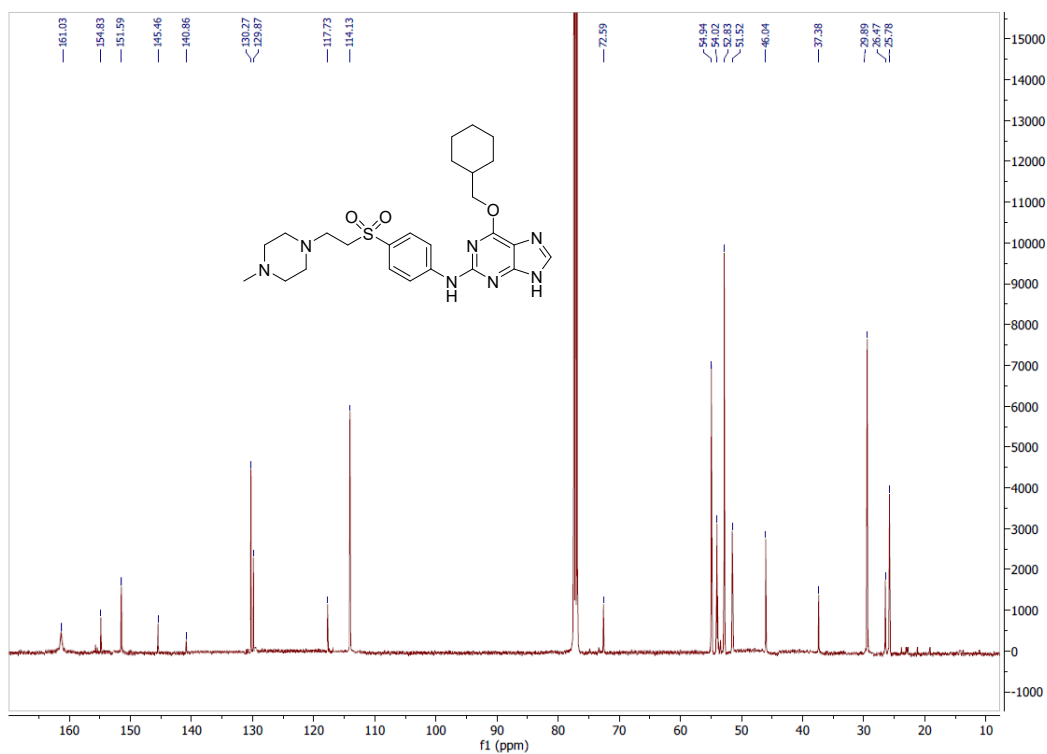

Figure S23.  $^1\text{H}$  NMR (300 MHz,  $\text{CDCl}_3$ ) of Compound 16

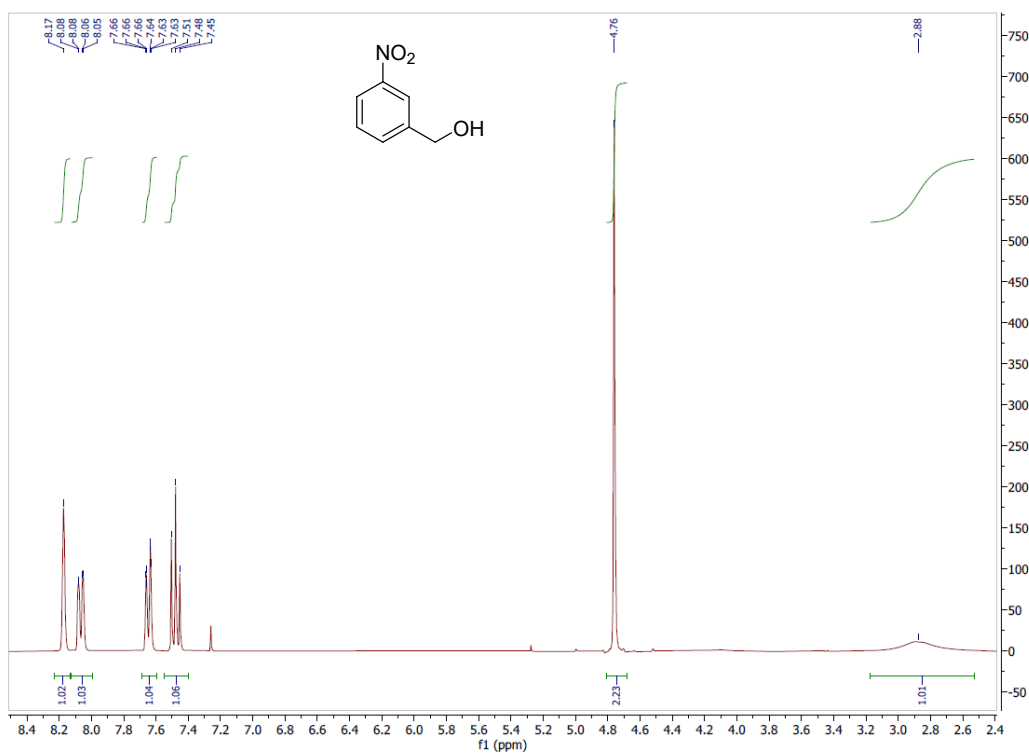



Figure S24. <sup>1</sup>H NMR (300 MHz, DMSO-d<sub>6</sub>) of Compound 17.

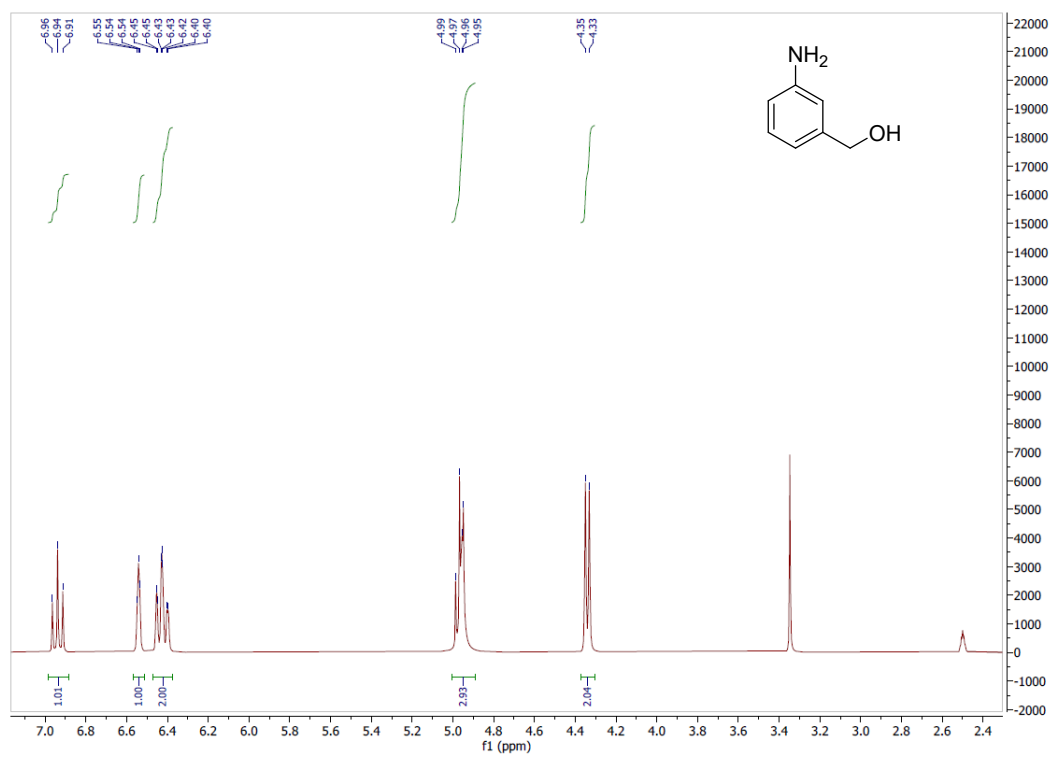

**<sup>1</sup>H NMR (500 MHz, CD<sub>3</sub>OD) of Compound 18.**

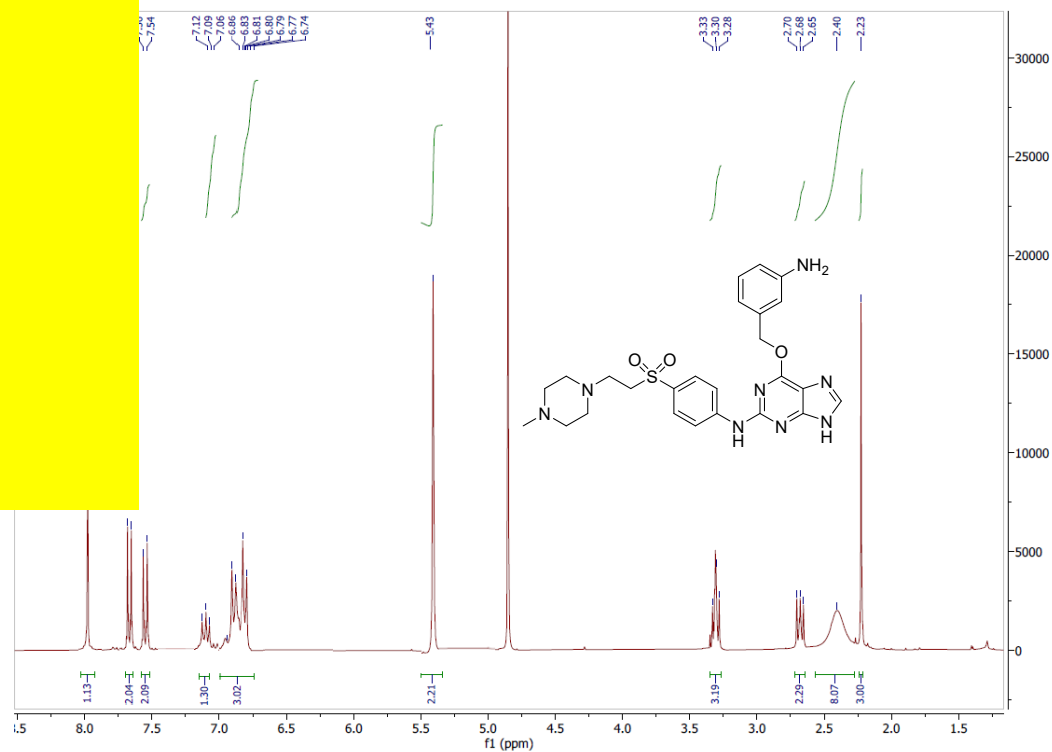

**Figure S26. <sup>13</sup>C NMR (125 MHz, CD<sub>3</sub>OD) of Compound 18.**

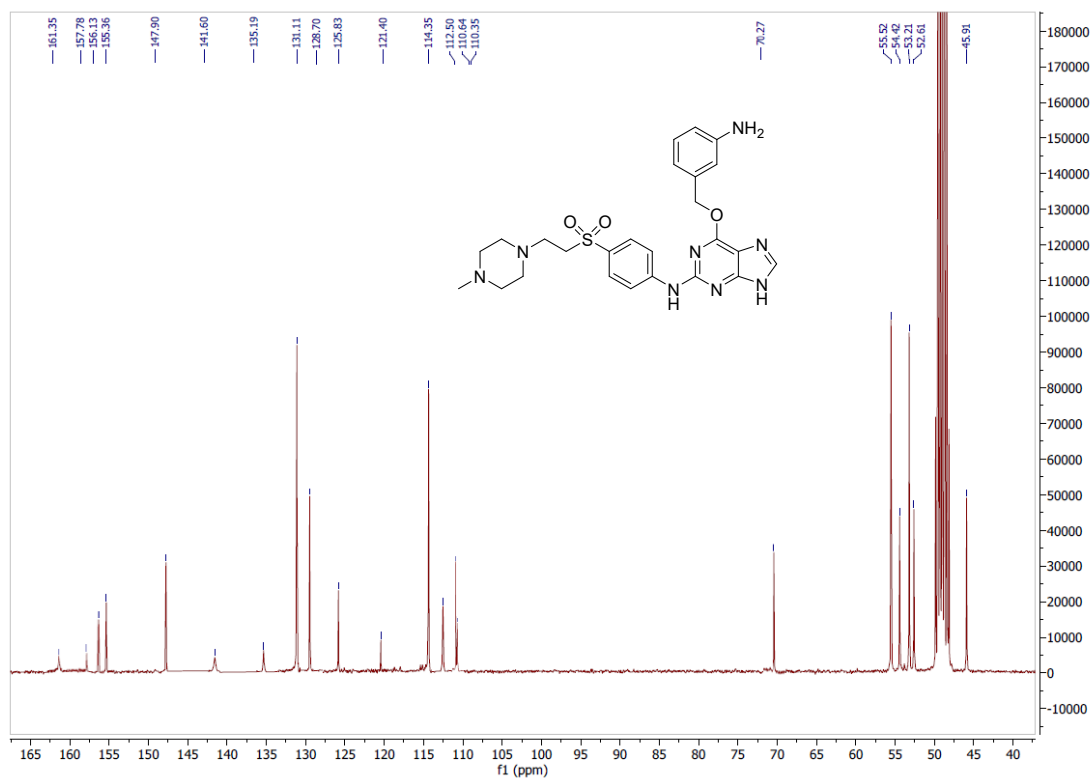

## References

1. R. J. Griffin, A. Henderson, N. J. Curtin, A. Echalié, J. A. Endicott, I. R. Hardcastle, D. R. Newell, M. E. M. Noble, L.-Z. Wang and B. T. Golding, *J. Am. Chem. Soc.*, 2006, **128**, 6012-6013.
2. P. J. Monsen and F. A. Luzzio, *Tet. Lett.*, 2020, **61**, 152575.
3. M.-U. Hung, S.-T. Yang, M. Ramanathan and S.-T. Liu, *Appl. Organometal. Chem.*, 2018, **32**, e3976.
